# Supplementary material
Source: Springer Nature journal article supplement (https://www.springermedizin.de/resource/supplementary/12913_2011_1831_MOESM4_ESM.pdf/9529038)

### Total delay

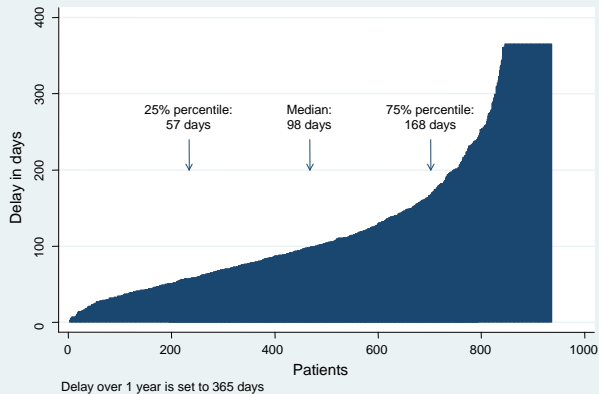

### Patient delay

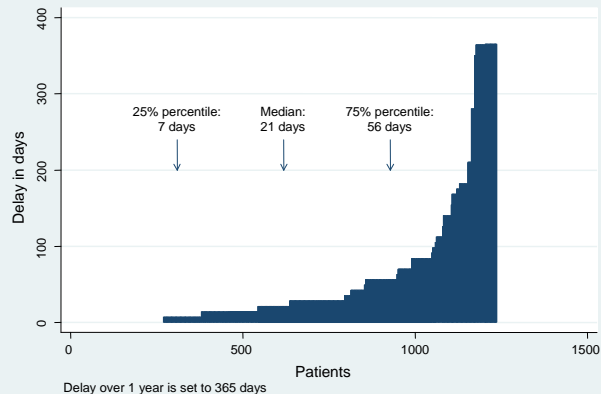

### GP delay

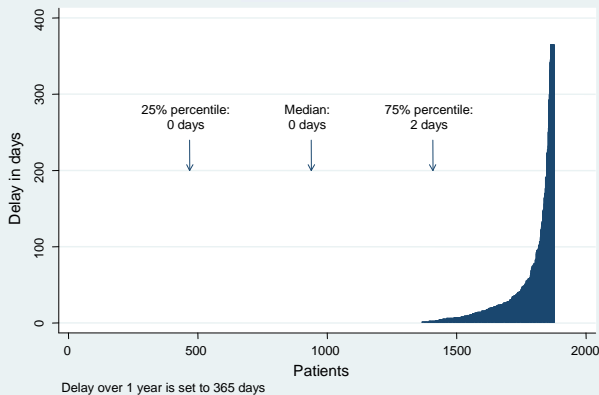

### System delay

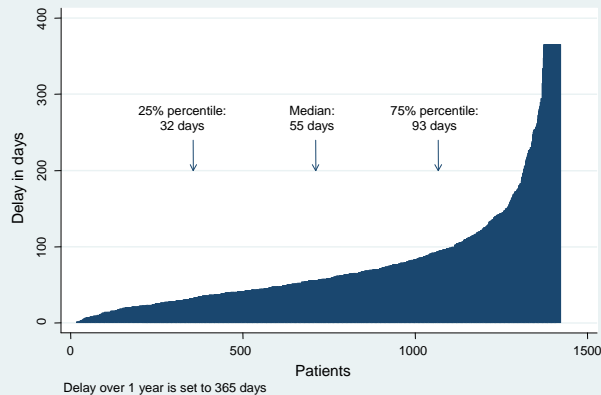

Supplement: MOESM4 [file 9529038]
